# Supplementary material for: Exposure of Cleft Lip and Palate Patients to Toxic Elements Released during Orthodontic Treatment in the Study of Non-Invasive Matrices
Source: PLoS One. 2015 Nov 6;10(11):e0140211. doi: 10.1371/journal.pone.0140211 (PMC4636263; doi:10.1371/journal.pone.0140211)
Supplement: S1 Data — (XLSX) [file pone.0140211.s001.xlsx]

## Sheet: Arkusz1
Grupa	Saliva	Cd	Cr	Cu	Fe	Mn	Mo	Ni	Si	Zn	Hair	Cd	Cr	Cu	Fe	Mn	Mo	Ni	Si	Zn
E	107	0.000185	0.002088	0.032867	0.065121	0.005985	0.0006	0.002698	0.493802	0.092005	107	0.028964	0.08508	20.5914	16.2523	1.06428	0.155902	0.474242	57.5022	0.00824737
E	110	0.000193	0.00241	0.044435	0.064963	0.012053	0.000636	0.013587	0.256749	0.153941	110	0.051901	0	10.1394	13.0228	0.746412	0.109506	0.260758	25.1902	0.0103516
C1	152	0.000343	0.005562	0.031924	0.125145	0.005953	0.001531	0.003164	0.656145	0.102486	152	0.015544	0.048881	26.0983	11.6385	0.433825	0.05224	0.076139	134.014	0.000568142
C1	138	0.000339	0.00365	0.065322	0.140344	0.009849	0	0.024109	4.09906	0.152734	138	0	0	27.1112	7.20742	0.273815	0.259787	0.435583	21.3293	0.0204218
C1	157	0.000413	0.010105	0.128012	0.1764	0.013284	0.002398	0	39.0513	2.15931	157	0.035861	0.821684	155.273	15.8269	2.48356	0.033456	0.300379	175.064	0.00171582
E	130	0.012635	0.115321	2.31914	8.32386	0.507045	0	0.130019	49.623	7.92519	130	0.03538	0	9.87636	7.80752	0.093319	0.553053	0.195655	18.4398	0.0106105
C1	148	0.000813	0.001117	0.02581	0.090019	0.003486	0	0.002547	6.61763	0.066837	148	0.077623	0.11192	24.312	15.1268	0.304304	0.129172	4.63211	57.6934	0.0802884
C1	161	0.000101	0.005369	0.098511	0.201962	0.011072	0.005036	0.006723	4.9982	2.64325	161	0.178517	0.004644	158.007	10.2582	0.826098	0.122657	0.066123	90.4765	0.000730831
E	133	0	0.001492	0.024282	0.07835	0.01765	0	0.006515	2.68876	0.184322	133	0.009454	0	31.763	12.7737	0.307912	0.070425	0.747637	26.4121	0.0283066
E	133	0	0.001492	0.024282	0.07835	0.01765	0	0.006515	2.68876	0.184322	133	0.009454	0	31.763	12.7737	0.307912	0.070425	0.747637	26.4121	0.0283066
C2	185	0.000249	0.005122	0.078792	0.135034	0.019337	0.001311	0.006696	2.26407	0.210619	185	0.044128	0.050807	11.8095	9.36094	0.119626	0.0799	0.292688	60.4048	0.00484544
C2	186	0.000191	0.002311	0.071305	0.105106	0.006676	0.000825	0	0.996492	0.192419	186	0.002307	0.04387	26.2742	11.8687	0.725437	0.040338	0.470984	38.4384	0.012253
C2	179	0.000466	0.004616	0.040728	0.111673	0.022533	0	0.002454	0.148794	0.156601	179	0.008489	0	9.34679	10.6548	0.203382	0.142032	0.221098	17.0185	0.0129916
C2	178	0.000704	0.004485	0.043471	0.112122	0.013309	0	0.002697	0.298406	0.275923	178	0.003204	0	24.663	8.94061	0.460161	0.094325	0.331643	20.4841	0.0161903
E	115	0.000173	0.001818	0.01396	0.087853	0.007749	0	0.001148	3.01334	0.572401	115	0.008635	0	12.0133	4.27844	0.123173	0.089345	0.34666	5.15314	0.0672716
C2	176	0	0.002109	0.021138	0.07101	0.012226	0.00073	0.002697	1.03159	0.101958	176	0.064101	0.028009	9.98655	13.2096	0.755726	0.124505	0.151558	35.3178	0.00429126
E	112	0.000391	0.005997	0.091406	0.361909	0.013579	0	0.013263	4.71208	0.377744	112	0.043057	0	12.7894	6.24502	0.220154	0	0.153145	15.2749	0.0100259
C2	170	0.000349	0.002211	0.04133	0.096273	0.004781	0.00073	0.005591	0.77195	0.166814	170	0.156973	0.030349	12.38	7.73626	0.721854	0.104247	0.581989	28.282	0.0205781
C2	192	0.001323	0.002947	0.122587	0.124479	0.010775	0.001429	0.004615	1.39538	0.114156	192	0.163811	0.177992	12.0857	22.5966	0.591053	0.068599	0.409292	78.9672	0.00518306
E	103	0.000335	0.004327	0.122815	0.078531	0.006869	0	0.014873	2.71298	0.38572	103	0	0	8.12286	4.70058	0.106837	0	0	4.5091	0
E	109	0.000229	0.008811	0.038947	0.167866	0.01135	0.002114	0.009193	0.499388	0.188365	109	0	0	8.78694	10.0085	0.217892	0.239034	0	26.9237	0
E	111	0.000327	0.005477	0.054679	0.147087	0.017233	0.000831	0.008319	1.18752	0.176671	111	0.04873	0	9.98078	3.44882	1.90401	0.089723	0	10.84	0
E	116	0.000109	0.000173	0.011852	0.031607	0.003272	5.3e-05	0.000827	3.04719	0.143215	116	0	0	15.6655	8.2075	0.172578	0.16903	0	18.7252	0
E	118	0.00062	0.002277	0.039434	0.183271	0.050542	0.0009	0.005056	1.25258	0.330705	118	0.012651	0	8.20991	6.54761	0.127745	0.104191	0	12.2961	0
E	122	0.000118	0.001941	0.005434	0.033711	0.005255	0.000729	0.004335	0.406367	0.064195	122	0.03931	0	8.80878	9.25108	0.195834	0.156673	0	12.9243	0
E	127	0.000123	0.003292	0.00763	0.222204	0.006712	0.00138	0.004718	0.181358	0.228868	127	0.070245	0	10.8376	5.23033	0.235323	0.213233	0	12.5481	0
E	129	0	0.003624	0.004407	0.054761	0.007095	0	0.004702	0.206753	0.119147	129	0.016687	0	7.40165	7.8112	0.162512	0.126811	0	17.1904	0
C1	156	0.000374	0.003836	0.042406	0.06928	0.007161	3.1e-05	0.000472	4.88678	0.1244	156	0.017745	0	6.65282	6.07941	1.15088	0	0	29.5817	0
E	132	3.3e-05	0.013571	0.045876	0.211122	0.009376	0.001241	0.00709	1.97243	0.338685	132	0	0	40.5437	10.7632	0.169549	0.094783	0.067711	34.2554	0.00197665
E	132	0.000342	0.002294	0.033369	0.084204	0.0161	0.000902	0.005966	0.740594	0.493934	132	0	0	40.5437	10.7632	0.169549	0.094783	0.067711	34.2554	0.00197665
C2	169	0.000109	0.002525	0.034302	0.108398	0.011102	0.000914	0.005891	0.665065	0.337824	169	0	0	6.37976	4.91224	0.065852	0.105531	0.051689	18.0694	0.00286058
E	120	0.000313	0.002914	0.008043	0.151733	0.005152	0.00387	0.013351	0.828062	0.028324	120	0.01102	0	9.82887	16.2285	0.345767	0.140754	0.145132	41.4993	0.00349722
E	126	0.000361	0.003559	0.028592	0.20284	0.066657	0.001946	0.003967	82.8182	0.28561	126	0.01352	0	8.92395	8.27538	0.162963	0	0.094047	19.6196	0.00479352
C1	151	0.000582	0.001473	0.09404	0.252189	0.034349	0.000345	0.005134	3.4989	0.237215	151	0	0	13.1186	6.56531	0.32688	0.118	0.105657	15.7993	0.00668745
E	108	0.000235	0.00316	0.018258	0.05781	0.012899	0.000273	0.001642	1.30824	0.222844	108	0.031022	0	10.6495	13.7494	0.553609	0.140626	0.145132	18.584	0.00780951
E	125	0.000346	0.005532	0.038672	0.184531	0.014737	0.001847	0.013486	1.22726	0.298484	125	0.031022	0	13.1049	13.7494	0.530922	0	0.240861	29.6554	0.00812199
E	117	0.000485	0.003535	0.024187	0.104342	0.052464	0	0.00492	0.946903	0.124428	117	0.033409	0	9.44973	7.59616	0.330172	0.133838	0.06041	7.24046	0.00834339
E	106	0.00013	0.001941	0.106779	0.062013	0.003466	0.000293	0.010426	8.87979	0.082781	106	0	0	14.1739	4.4824	0.179654	0.059499	0.049801	5.94211	0.00838103
E	114	5e-05	0.002144	0.006088	0.062841	0.004186	0.000118	0.004781	0.215061	0.045515	114	0.181838	0	6.97774	11.8065	1.25121	0.140626	0.167848	18.584	0.00903186
E	105	0.000121	0.003517	0.030498	0.099927	0.005165	0.002149	0.006859	0.577965	0.184019	105	0	0	11.5053	3.59801	0.553609	0	0.111883	10.9995	0.0101716
C1	136	0.000606	0.006698	0.045196	0.160198	0.026922	0.001456	0.00552	3.13612	0.092648	136	0.003882	0	7.37136	7.31316	0.216516	0.196869	0.317125	29.8624	0.0106195
E	121	0.000177	0.001858	0.010698	0.038514	0.002144	0.001538	0.011639	3.68011	0.055969	121	0	0	10.3217	9.88577	0.406496	0.191489	0.34206	29.7639	0.0114924
C2	168	6.6e-05	0.002153	0.006226	0.069259	0.012081	0	0.002007	0.085953	0.069073	168	0	0	10.043	9.74262	0.197681	0.154765	0.190209	15.7001	0.0121151
E	124	0.000514	0.006162	0.03914	0.207809	0.004646	0	0.006071	1.65744	0.196195	124	0.038707	0	9.25293	7.85485	0.275058	0	0.215754	17.3642	0.0124252
C1	139	0.000136	0.00727	0.031197	0.077453	0.015167	0.00102	0.018839	4.14287	0.154429	139	0	0	8.85288	13.507	0.218496	0.310444	0.410952	32.5362	0.0126306
C2	174	0.000185	0.002306	0.021138	0.03611	0.019922	0.000218	0.000552	0.071106	0.06531	174	0	0	8.73798	5.74695	0.092767	0.067848	0.244996	17.6117	0.013911
E	104	0.000248	0.000754	0.005341	0.046984	0.003341	0.001301	0.001008	5.80991	0.041419	104	0.016631	0	12.4719	6.09667	0.301898	0	0.215572	15.0281	0.0143446
C2	172	0.000382	0.003366	0.032471	0.07101	0.033919	3.2e-05	0	6.08823	0.150808	172	0	0	11.12	5.51508	0.155602	0.090383	0.144884	9.99959	0.014489
C1	142	7.8e-05	0.004911	0.018799	0.075	0.016817	0.001389	0.004921	1.15614	0.115336	142	0	0	35.6926	9.52972	0.268663	0.155011	0.58685	37.9917	0.0154468
C1	146	0.000276	0.002769	0.037885	0.073812	0.016387	0	0.004998	2.16249	0.120589	146	0.036888	0	18.8375	11.3106	0.5368	0.169431	0.546134	26.7207	0.0204386
C2	184	0	0.002811	0.026735	0.130907	0.02493	0.0013	0.006151	22.9154	0.16061	184	0.011108	0	12.9697	10.8152	0.26837	0.107662	0.907621	42.8037	0.0212043
C2	175	0.000143	0.002629	0.073778	0.218292	0.040252	0	0.004226	3.48504	0.449368	175	0.010438	0	27.1439	8.61734	0.370108	0.161045	0.302261	13.7037	0.0220569
E	134	0.000345	0.004376	0.041596	0.441555	0.048242	0.00358	0.006052	4.81343	0.252036	134	0.009032	0	24.4724	8.04953	0.261714	0.063077	0.465517	17.9365	0.0259536
E	119	0	0	0.005454	0.033017	0.003129	0	0.003426	4.8113	0.918213	119	0.031268	0	18.0299	3.5232	0.205419	0.044507	0.163376	5.96277	0.0273993
C1	150	0	0.012047	0.133104	0.321727	0.022245	0.001807	0.110316	4.55197	0.202078	150	0.021532	0	77.0431	12.7054	0.655004	0.117756	3.60283	111.5	0.0323124
E	128	0.000292	0	0.005311	0.071404	0.00402	0	0.001847	6.87458	0.050421	128	0.01438	0	6.3765	3.02425	0.209752	0	0.140776	3.17034	0.0444041
C1	137	0.000477	0.002956	0.013892	0.246751	0.020279	0.002614	0.003686	0.640251	0.083747	137	0	0	14.84	5.94008	0.095691	0.144056	0.573698	10.7999	0.0531207
C2	190	0.000429	0.003667	0.079046	0.229338	0.021816	0.002545	0.002216	0.56462	0.393972	190	0.042848	0.001792	16.8322	29.3946	0.733408	0.101195	0.071356	121.71	0.000586279
C1	144	0.000113	0.004424	0.065052	0.253314	0.024251	0.001581	0.014114	5.78869	0.25234	144	0.031319	0.005608	77.0731	12.1159	0.283327	0.160993	0.499274	57.7506	0.00864535
C1	149	0.000311	0.001634	0.268461	0.138878	0.009078	0.001707	0.005472	4.9333	0.101826	149	0.010488	0.01023	10.2781	18.4358	0.511515	0.161742	0.365366	50.8402	0.00718656
C1	159	0.000342	0.004888	0.051525	0.125257	0.020159	0.001817	0.006026	0.642558	0.22496	159	0.033148	0.007573	12.754	6.56886	0.13135	0.103366	0.098119	30.9211	0.00317321
C1	166	0.001557	0.001757	0.006267	0.067942	0.025338	0.001124	0.002381	0.333827	0.134475	166	0.065297	0.011357	12.3424	7.94411	0.170367	0	0.291693	36.6884	0.00795055
C2	183	0.000172	0.003478	0.077013	0.195847	0.008687	0	0.003698	1.02087	0.379273	183	0	0.006825	31.4903	8.58045	0.347966	0.127728	0.069482	21.3636	0.00325235
C2	181	0	0.003277	0.052317	0.128819	0.012226	0.000413	0.000821	1.03159	0.190669	181	0	0.007614	19.0975	7.23732	0.088739	0.020808	0.011644	19.5111	0.000596788
C2	188	0.000257	0.002947	0.055913	0.459528	0.017966	0.001178	0.001737	0.681096	0.201755	188	0.014379	0.126953	39.6823	19.8474	0.494858	0	0.268277	301.805	0.000888908
C2	195	0.000391	0.005626	0.09194	0.187044	0.007944	0.001674	0.010541	0.190923	0.205656	195	0.003679	0.012104	5.62615	7.03891	0.378026	0.070364	0.137322	28.105	0.00488603
C1	160	0.000591	0.011324	0.150481	0.237914	0.043302	0.001691	0.005965	7.1062	0.172535	160	0.004142	0.019276	17.6095	6.75004	0.776783	0.002132	0.761883	43.8382	0.0173794
C1	135	0.000263	0.002911	0.020302	0.038345	0.011643	0	0	0.921523	0.076874	135	0	0.014967	564.661	6.47377	0.646067	0.395219		29.8317
C1	164	0.000447	0.003054	0.01256	0.087187	0.024157	0.003029	0.003257	0.369654	0.075291	164	0.019759	0.031075	20.6547	9.73598	0.430574	0.009845	0.464591	42.9288	0.0108224
C1	153	0.000141	0.003333	0.034635	0.357197	0.020896	0	0.000593	0.362849	0.102518	153	0.030405	0.091288	35.2549	35.6687	2.0149	0	0.62107	124.041	0.00500697
C1	165	0.000719	0.0042	0.074187	0.262538	0.090228	0.001441	0.004186	8.31481	0.143204	165	0.031201	0.201624	20.1129	8.4417	0.357345	0.795534	0.40491	249.617	0.00162213
C2	173	5.8e-05	0.002845	0.011143	0.096651	0.0187	0.002452	0.004502	4.14879	0.141197	173	0	0.064404	10.1603	14.1098	0.165266	0.297679	0.175121	78.209	0.00223914
C2	171	0.000428	0.001215	0.068295	0.159464	0.012618	0.001571	0.000585	2.93346	0.591932	171	0.34028	0.025107	16.1526	8.15991	0.540272	0.185475	0.516449	28.3459	0.0182195
C2	191	0.000247	0.004593	0.053382	0.2685	0.018275	0.001338	0.004356	0.555471	0.197223	191	0.064086	0.09075	8.40868	23.5118	1.39736	0.102288	0.243313	83.2722	0.0029219
C1	141	0.001229	0.002928	0.064294	0.161811	0.016069	0.001253	0.009462	0.81998	0.206178	141	0.095545	0.16606	21.2127	17.0511	0.903616	0	0.594421	146.96	0.00404478
C1	162	0.000382	0.005323	0.070546	0.133499	0.017765	0.001519	0.004925	0.293495	0.130144	162	0.029998	0.035311	15.009	5.37173	0.48479	0.0798	0.276442	30.4143	0.00908921
E	113	0.000313	0.002021	0.020656	0.14446	0.006697	0	0.001385	0.564299	0.209678	113	0.070915	0.08435	10.6495	25.9424	0.922237	0	0	59.3286	0
E	123	0.000245	0.001605	0.003596	0.015514	0.004448	0.000138	0.000197	0.040209	0.038399	123	0.026173	0.011407	9.44361	7.61088	0.178264	0.117205	0	7.30706	0
C2	180	0.000454	0.003043	0.047168	0.148156	0.017591	0.001943	0.003294	0.453121	0.196121	180	0	0.083459	8.54747	26.8833	0.511803	0	0.052522	53.2656	0.00098604
C1	143	0.000401	0	0.009004	0.131804	0.014425	7e-06	0.004302	0.599729	0.084757	143	0.041875	0.173084	16.2271	16.6854	0.226644	0.063452	1.0881	107.172	0.0101528
C1	155	3.7e-05	0.003693	0.057954	0.064382	0.00782	0	0	4.54614	0.189555	155	0.020274	0.066893	32.3036	9.97345	0.592381	0	0.027956	36.565	0.000764556
C1	147	0.000335	0.002606	0.007695	0.033948	0.005608	0	0.000567	3.37854	0.050565	147	0.011275	0.03607	42.0221	8.75548	0.220756	0.120325	0.258842	19.3516	0.0133757
C2	193	0.000273	0.002504	0.058899	0.103959	0.01497	0.002398	0.00091	0.124657	0.089022	193	0.03589	0.087417	62.8104	7.30582	0.504584	0.084617	1.25008	46.5157	0.0268744
C2	194	0.000211	0.005722	0.055288	0.146491	0.005833	0.002503	0.002238	3.12284	0.102553	194	0.139176	0.100476	17.2	12.6813	1.28465	0.022544	0.313163	48.8031	0.00641687
C1	158	0	0.007577	0.05934	0.122589	0.007067	0.001558	0.004891	0.362571	0.213005	158	0.060174	0.143473	31.2895	9.92636	0.340056	0	0.377331	67.292	0.00560737
E	101	0.000263	0.001361	0.201165	0.058797	0.004195	0.000447	0.003704	4.99304	0.549023	101	0.065218	0.033578	12.0983	8.36296	0.787397	0.079411	0	13.3751	0
E	131	0	0.005797	0.057244	0.123737	0.018441	0	0.016902	0.646791	0.218143	131	0.019899	0.05891	16.5605	9.41561	0.225614	0.147861	0.070768	18.8313	0.003758
C1	140	0.000344	0.003192	0.016207	0.262279	0.016787	0.000152	0.002582	0.908147	0.113398	140	0.089035	0.241482	15.0296	35.3015	1.04138	0.058383	0.437838	76.0522	0.00575707
C2	167	0.000153	0.001747	0.050875	0.11976	0.008734	0.000726	0.003714	2.67647	0.359082	167	0.017704	0.078062	7.70376	6.32578	0.252057	0.077472	0.184449	23.1489	0.00796794
C2	187	2.9e-05	0.002888	0.021662	0.029484	0.01106	0.000948	0.002229	0.124662	0.063776	187	0.052711	0.206419	26.0477	23.227	2.75047	0	3.51842	53.0518	0.0663205
C1	145	0.000263	0.002911	0.020302	0.038345	0.011643	0	0	0.921523	0.076874	145	0	0.098028	16.3853	11.6982	0.119204	0.163519	0.121073	21.1339	0.00572885
C1	154	0.000294	0.003195	0.042137	0.11377	0.017937	0.000567	0.000695	3.54475	0.159634	154	0.17301	0.256733	48.6081	11.0374	0.569484	0.101438	1.34733	43.4807	0.0309869
C1	163	0.000503	0.004351	0.030706	0.270756	0.033348	0.000201	0.006949	3.51455	0.288165	163	0.055015	0.174709	26.6899	10.3835	0.54591	0.000848	0.238685	28.333	0.00842428
C2	182	0.000206	0.002975	0.029495	0.11015	0.021504	0.001286	0.005339	1.16444	0.606756	182	0	0.198177	19.0741	9.56967	0.172534	0.104091	0.137822	28.6217	0.0048153
E	102	0	0.004315	0.033689	0.086101	0.009752	0.001101	0.001569	0.326316	0.120391	102	0.018786	0.151707	9.16213	10.3756	0.140241	0.102066	0.070951	18.1889	0.00390079
C2	177	0.000275	0.002109	0.041413	0.078196	0.013429	0.000995	0.006609	0.418558	0.155411	177	0.090864	0.294595	23.1324	11.0303	0.387778	0.176154	0.241308	29.6182	0.00814729
C2	189	0.001249	0.004481	0.167149	0.097076	0.050022	0.001206	0	0.587799	0.180257	189	0.072168	1.78076	40.7263	45.7753	1.1661	0.09443	0.286308	135.011	0.00212063
